# Supplementary material
Source: PubMed Central journal article supplement (PMC4140157)
Supplement: supp_dc14-0656v140656_DC140656SupplementaryData.pdf [file supp_dc14-0656v140656_DC140656SupplementaryData.pdf]

SUPPLEMENTARY DATA

***Pennington Biomedical Research Center  
(Baton Rouge, LA)***

George A. Bray, MD\*

Annie Chatellier, RN, CCRC\*\*

Crystal Duncan, LPN

Frank L. Greenway, MD

Erma Levy, RD

Donna H. Ryan, MD

***University of Chicago (Chicago, IL)***

David Ehrmann, MD\*

Margaret J. Matulik, RN, BSN\*\*

Kirsten Czech, MS

Catherine DeSandre, BA

***Jefferson Medical College (Philadelphia, PA)***

Barry J. Goldstein, MD, PhD\*

Kevin Furlong, DO\*

Kellie A. Smith, RN, MSN\*\*

Wendi Wildman, RN\*\*

Constance Pepe, MS, RD

***University of Miami (Miami, FL)***

Ronald B. Goldberg, MD\*

Jeanette Calles, MSEd\*\*

Juliet Ojito, RN\*\*

Sumaya Castillo-Florez, MPH

Hermes J. Florez, MD, PhD

Anna Giannella, RD, MS

Olga Lara

Beth Veciana

***The University of Texas Health Science Center  
(San Antonio, TX)***

Steven M. Haffner, MD, MPH\*

Helen P. Hazuda, PhD\*

Maria G. Montez, RN, MSHP, CDE\*\*

Carlos Lorenzo, MD, PhD

Arlene Martinez, RN, BSN, CDE

***University of Colorado (Denver, CO)***

Richard F. Hamman, MD, DrPH\*

Dana Dabelea, MD, PhD\*

Lisa Testaverde, MS\*\*

Alexis Bouffard, MA, RN, BSN

Tonya Jenkins, RD, CDE

Dione Lenz, RN, BSN, CDE

Leigh Perreault, MD

David W. Price, MD

Sheila C. Steinke, MS

***Joslin Diabetes Center (Boston, MA)***

Edward S. Horton, MD\*

Catherine S. Poirier, RN, BSN\*\*

Kati Swift, RN, BSN\*\*

Enrique Caballero, MD

Barbara Fagnoli, RD

Ashley Guidi, BS

Mathew Guido, BA

Sharon D. Jackson, MS, RD, CDE

Lori Lambert, MS, RD, LD

Kathleen E. Lawton, RN

Sarah Ledbury, Med, RD

Jessica Sansoucy, BS

Jeanne Spellman, RD

***VA Puget Sound Health Care System and  
University of Washington (Seattle, WA)***

Steven E. Kahn, MB, ChB\*

Brenda K. Montgomery, RN, BSN, CDE\*\*

Wilfred Fujimoto, MD

Robert H. Knopp, MD (deceased)

Edward W. Lipkin, MD

Anne Murillo, BS

Dace Trence, MD

***University of Tennessee (Memphis, TN)***

Abbas E. Kitabchi, PhD, MD, FACP\*

Mary E. Murphy, RN, MS, CDE, MBA\*\*

William B. Applegate, MD, MPH

Michael Bryer-Ash, MD

Samuel Dagogo-Jack, MD, MSc, FRCP, FACP

Sandra L. Frieson, RN

Helen Lambeth, RN, BSN

Lynne C. Lichtermann, RN, BSN

Hooman Otkaei, MD

Lily M.K. Rutledge, RN, BSN

Amy R. Sherman, RD, LD

Clara M. Smith, RD, MHP, LDN

Judith E. Soberman, MD

Beverly Williams-Cleaves, MD

***Northwestern University's Feinberg School of  
Medicine (Chicago, IL)***

Boyd E. Metzger, MD\*

Mark E. Molitch, MD\*

Mariana K. Johnson, MS, RN\*\*

Mimi M. Giles, MS, RD

Diane Larsen, BS

Charlotte Niznik, MS, RN, CDE

Samsam C. Pen, BA

Pamela A. Schinleber, RN, MS

***Massachusetts General Hospital (Boston, MA)***

David M. Nathan, MD\*

Mary Larkin, MSN\*

## SUPPLEMENTARY DATA

Charles McKittrick, BSN\*\*  
Heather Turgeon, BSN  
Ellen Anderson, MS, RD  
Laurie Bissett, MS, RD  
Kristy Bondi, BS  
Enrico Cagliero, MD  
Kali D'Anna  
Linda Delahanty, MS, RD  
Jose C. Florez, MD, PhD  
Valerie Goldman, MS, RD  
Alexandra Poulos  
Elyse Raymond, BS  
Christine Stevens, RN  
Beverly Tseng  
**University of California-San Diego (San Diego, CA)**  
Elizabeth Barrett-Connor, MD\*  
Mary Lou Carrion-Petersen, RN, BSN\*\*  
Lauren N. Claravall, BS  
Jonalle M. Dowden, BS  
Javiva Horne, RD  
Diana Leos, RN, BSN  
Sundar Mudaliar, MD  
Jean Smith, RN  
Simona Szerdi Janisch, BS  
Karen Vejvoda, RN, BSN, CDE, CCRC  
**St. Luke's-Roosevelt Hospital (New York, NY)**  
F. Xavier Pi-Sunyer, MD\*  
Jane E. Lee, MS\*\*  
Sandra T. Foo, MD  
Susan Hagamen, MS, RN, CDE  
**Indiana University (Indianapolis, IN)**  
David G. Marrero, PhD\*  
Susie M. Kelly, RN, CDE\*\*  
Ronald T. Ackermann, MD  
Edwin S. Fineberg, MD  
Angela Hadden  
Marcia A. Jackson  
Marion S. Kirkman, MD  
Kieren J. Mather, MD  
Paris J. Roach, MD  
Madelyn L. Wheeler, RD  
**Medstar Research Institute (Washington, DC)**  
Robert E. Ratner, MD\*  
Vanita Aroda, MD\*  
Sue Shapiro, RN, BSN, CCRC\*\*  
Catherine Bavido-Arrage, MS, RD, LD  
Lilia Leon  
Gabriel Uwaifo, MD  
Debra Wells-Thayer, NP, CDE  
Renee Wiggins, RD  
**University of Southern California/UCLA Research Center (Alhambra, CA)**  
Mohammed F. Saad, MD\*  
Karol Watson, MD\*  
Medhat Botrous, MD\*\*  
Sujata Jinagouda, MD\*\*  
Maria Budget  
Claudia Conzues  
Perpetua Magpuri  
Kathy Ngo  
Kathy Xaphthalmous  
**Washington University (St. Louis, MO)**  
Neil H. White, MD, CDE\*  
Samia Das, MS, MBA, RD, LD\*\*  
Ana Santiago, RD  
Angela L. Brown, MD  
Cormarie Wernimont, RD, LD  
**Johns Hopkins School of Medicine (Baltimore, MD)**  
Christopher D. Saudek, MD\* (deceased)  
Sherita Hill Golden, MD, MHS, FAHA\*  
Tracy Whittington, BS\*\*  
Jeanne M. Clark, MD  
Alicia Greene  
Dawn Jiggetts  
Henry Mosley  
John Reusing  
Richard R. Rubin, PhD (deceased)  
Shawne Stephens  
Evonne Utsey  
**University of New Mexico (Albuquerque, NM)**  
David S. Schade, MD\*  
Karwyn S. Adams, RN, MSN\*\*  
Claire Hemphill, RN, BSN\*\*  
Penny Hyde, RN, BSN\*\*  
Janene L. Canady, RN, BSN, CDE  
Kathleen Colleran, MD  
Ysela Gonzales  
Doris A. Hernandez-McGinnis  
Carolyn King, Med  
**Albert Einstein College of Medicine (Bronx, NY)**  
Jill Crandall, MD\*  
Janet O. Brown, RN, MPH, MSN\*\*  
Elsie Adorno, BS

## SUPPLEMENTARY DATA

Helena Duffy, MS, C-ANP  
Angela Goldstein, FNP-C, NPP, CSW  
Jennifer Lukin, BA  
Helen Martinez, RN, MSN, FNP-C  
Dorothy Pompei, BA  
Harry Shamoon, MD  
Jonathan Scheindlin, MD  
Elizabeth A. Walker, RN, DNSc, CDE  
Judith Wylie-Rosett, EdD, RD  
**University of Pittsburgh (Pittsburgh, PA)**  
Trevor Orchard, MD\*  
Andrea Kriska, PhD\*  
Susan Jeffries, RN, MSN\*\*  
M. Kaye Kramer, BSN, MPH\*\*  
Marie Smith, RN, BSN\*\*  
Catherine Benchoff  
Stephanie Guimond, BS  
Jessica Pettigrew, CMA  
Debra Rubinstein, MD  
Linda Semler, MS, RD  
Elizabeth Venditti, PhD  
Valarie Weinzierl, MPH  
**University of Hawaii (Honolulu, HI)**  
Richard F. Arakaki, MD\*  
Narleen K. Baker-Ladao, BS\*\*  
Mae K. Isonaga, RD, MPH\*\*  
Nina E. Bermudez, MS  
Marjorie K. Mau, MD  
**Southwest American Indian Centers (Phoenix, AZ; Shiprock, NM; Zuni, NM)**  
William C. Knowler, MD, DrPH\*  
Norman Coeoyate\*\*  
Mary A. Hoskin, RD, MS\*\*  
Camille Natewa\*\*  
Carol A. Percy, RN, MS\*\*  
Kelly J. Acton, MD, MPH  
Vickie L. Andre, RN, FNP  
Shandiin Begay, MPH  
Brian C. Bucca, OD, FAAO  
Sherron Cook  
Matthew S. Doughty, MD  
Justin Glass, MD  
Martia Glass, MD  
Robert L. Hanson, MD, MPH  
Doug Hassenpflug, OD  
Louise E. Ingraham, MS, RD, LN  
Kathleen M. Kobus, RNC-ANP  
Jonathan Krakoff, MD

Catherine Manus, LPN  
Cherie McCabe  
Sara Michaels, MD  
Tina Morgan  
Julie A. Nelson, RD  
Robert J. Roy  
Miranda Smart  
Darryl P. Tonemah, PhD  
Charlton Wilson, MD  
**George Washington University Biostatistics Center (DPP Coordinating Center Rockville, MD)**  
Sarah Fowler, PhD\*  
Marinella Temprosa, PhD\*  
Michael D. Larsen, PhD\*  
Tina Brenneman\*\*  
Hanna Sherif, MS\*\*  
Sharon L. Edelstein, ScM\*\*  
Solome Abebe, MS  
Julie Bamdad, MS  
Melanie Barkalow  
Joel Bethedu  
Tsedenia Bezabeh  
Jackie Callaghan  
Costas Christophi, PhD  
Nicole Butler  
Mary Foulkes, PhD  
Yuping Gao  
Robert Gooding  
Adrienne Gottlieb  
Nisha Grover  
Heather Hoffman, PhD  
Kathleen Jablonski, PhD  
Richard Katz, MD  
Preethy Kolinjivadi, MS  
John M. Lachin, ScD  
Yong Ma, PhD  
Qing Pan, PhD  
Susan Reamer  
Alla Sapozhnikova  
**Lifestyle Resource Core**  
Elizabeth M. Venditti, PhD\*  
Andrea M. Kriska, PhD  
Linda Semler, MS, RD  
Valarie Weinzierl, MPH

SUPPLEMENTARY DATA

**Central Biochemistry Laboratory (Seattle, WA)**

Santica Marcovina, PhD, ScD\*

Greg Strylewicz, PhD\*\*

John Albers, PhD

**Epidemiological Cardiology Research Center-Epicare (Winston-Salem, NC)**

Ronald J. Prineas, MD, PhD\*

Teresa Alexander

Charles Campbell, MS

Sharon Hall

Susan Hensley

Yabing Li, MD

Margaret Mills

Elsayed Soliman, MD

Zhuming Zhang, MD

**Fundus Photo Reading Center (Madison, WI)**

Ronald Danis, MD\*

Matthew Davis, MD\*

Larry Hubbard\*

Ryan Endres\*\*

Deborah Elsas\*\*

Samantha Johnson\*\*

Vonnie Gama

Anne Goulding

**Carotid Ultrasound**

Gregory Evans

**CT Scan Reading Center**

Elizabeth Stamm

**Neurocognitive Assessment Group**

Jose A. Luchsinger, MD, MPH

**NIH/NIDDK (Bethesda, MD)**

Judith Fradkin, MD

Sanford Garfield, PhD

**Centers for Disease Control & Prevention (Atlanta, GA)**

Edward Gregg, PhD

Ping Zhang, PhD

**University of Michigan (Ann Arbor, MI)**

William H. Herman, MD, MPH

Morton B. Brown, PhD

**Nutrition Coding Center (Columbia, SC)**

Elizabeth Mayer-Davis, PhD\*

Robert R. Moran, PhD\*\*

**Quality of Well-Being Center (La Jolla, CA)**

Ted Ganiats, MD\*

Andrew J. Sarkin, PhD\*\*

Naomi Katzir

Erik Groessl, PhD

**Coronary Artery Calcification Reading Center**

Matthew Budoff, MD

Chris Dailing

**Genetics Working Group**

Jose C. Florez, MD, PhD<sup>1, 2</sup>

David Altshuler, MD, PhD<sup>1, 2</sup>

Liana K. Billings, MD<sup>1</sup>

Ling Chen, MS<sup>1</sup>

Maegan Harden, BS<sup>2</sup>

Robert L. Hanson, MD, MPH<sup>3</sup>

William C. Knowler, MD, DrPH<sup>3</sup>

Toni I. Pollin, PhD<sup>4</sup>

Alan R. Shuldiner, MD<sup>4</sup>

Kathleen Jablonski, PhD<sup>5</sup>

Paul W. Franks, PhD, MPH, MS<sup>6, 7, 8</sup>

Marie-France Hivert, MD<sup>9</sup>

1=Massachusetts General Hospital

2=Broad Institute

3=NIDDK

4=University of Maryland

5=Coordinating Center

6=Lund University, Sweden

7=Umeå University, Sweden

8=Harvard School of Public Health

9=Université de Sherbrooke

\* denotes Principal Investigator

\*\* denotes Program Coordinator
